# Supplementary material for: The transcriptome of Mycobacterium tuberculosis in a lipid-rich dormancy model through RNAseq analysis
Source: PubMed Central journal article supplement (PMC5732278; doi:10.1038/s41598-017-17751-x), 2017-12-15
Supplement: 41598_2017_17751_MOESM3_ESM.pdf [file 41598_2017_17751_MOESM3_ESM.pdf]

## SUPPLEMENTAL MATERIAL

Table S3. RNA-seq mapping results. Total number of reads (in millions) and percentages of total paired reads.

| <b>Sample</b> | <b>Total paired reads</b> | <b>Sense reads: CDS and ncRNA</b> | <b>Sense reads: only ncRNA</b> | <b>Anti-sense reads</b> |
|---------------|---------------------------|-----------------------------------|--------------------------------|-------------------------|
| <b>DE</b>     | 51.2                      | 38.6 (75.4 %)                     | 6.4 (12.5 %)                   | 2.1 (4.2 %)             |
| <b>DE</b>     | 49.5                      | 36.9 (74.5 %)                     | 5.8 (11.6 %)                   | 2.0 (4.1 %)             |
| <b>DS</b>     | 51.4                      | 36.0 (70.0 %)                     | 12.1 (23.5 %)                  | 4.4 (8.5 %)             |
| <b>DS</b>     | 62.7                      | 45.1 (72.0 %)                     | 14.3 (22.8 %)                  | 5.9 (9.4 %)             |
| <b>DNRP1</b>  | 61.8                      | 43.6 (70.7 %)                     | 7.9 (12.8 %)                   | 3.6 (5.8 %)             |
| <b>DNRP1</b>  | 31.0                      | 23.4 (75.6 %)                     | 6.7 (21.5 %)                   | 1.3 (4.3 %)             |
| <b>LE</b>     | 58.5                      | 47.2 (80.6 %)                     | 8.8 (15.1 %)                   | 1.8 (3.0 %)             |
| <b>LE</b>     | 53.2                      | 42.4 (79.6 %)                     | 9.6 (18.1 %)                   | 1.5 (2.7 %)             |
| <b>LS</b>     | 57.5                      | 46.1 (80.1 %)                     | 18.9 (32.9 %)                  | 0.87 (1.5 %)            |
| <b>LS</b>     | 51.7                      | 40.6 (78.5 %)                     | 16.3 (31.4 %)                  | 0.94 (1.8 %)            |
| <b>LNRP1</b>  | 65.8                      | 51.1 (77.6 %)                     | 13.2 (20.0 %)                  | 2.6 (4.0 %)             |
| <b>LNRP1</b>  | 63.7                      | 51.4 (80.6 %)                     | 15.7 (24.6 %)                  | 1.6 (2.6 %)             |

Table S4. Differential expression analysis of functional categories. Dextrose conditions were used as control group and Lipid as treatment (general D vs L), growth stages were used as a batch effect.

| <b>Increased expression in the presence of lipids:</b>  |                                         |                |                    |                 |
|---------------------------------------------------------|-----------------------------------------|----------------|--------------------|-----------------|
| <b>Functional category</b>                              | <b>Mean log<sub>2</sub> fold change</b> | <b>p value</b> | <b>FDR</b>         | <b>Set size</b> |
| <i>Intermediary metabolism and respiration</i>          | 3.2549851                               | 0.000577347    | <b>0.005773469</b> | 920             |
| <i>Lipid metabolism</i>                                 | 2.63201945                              | 0.004369886    | <b>0.021849431</b> | 268             |
| <i>Regulatory proteins</i>                              | 0.938987183                             | 0.174168298    | 0.580560994        | 195             |
| <i>Virulence, detoxification and adaptation</i>         | 0.654360315                             | 0.256602683    | 0.641506708        | 236             |
| <i>Cell wall and cell processes</i>                     | 0.382127259                             | 0.351210219    | 0.702420439        | 761             |
| <i>Conserved hypothetical</i>                           | 0.160041507                             | 0.436432065    | 0.727386776        | 1027            |
| <i>Information pathways</i>                             | -0.260140305                            | 0.602561252    | 0.860801789        | 241             |
| <i>Stable RNA</i>                                       | -0.797625025                            | 0.785588402    | 0.981985503        | 29              |
| <i>PE/PPE</i>                                           | -2.414969445                            | 0.991853302    | 0.99886261         | 162             |
| <i>Insertion seqs and phages</i>                        | -3.098665085                            | 0.99886261     | 0.99886261         | 87              |
| <b>Diminished expression in the presence of lipids:</b> |                                         |                |                    |                 |
| <b>Functional category</b>                              | <b>Mean log<sub>2</sub> fold change</b> | <b>p value</b> | <b>FDR</b>         | <b>Set size</b> |
| <i>Insertion seqs and phages</i>                        | -3.098665085                            | 0.00113739     | <b>0.011373897</b> | 87              |
| <i>PE/PPE</i>                                           | -2.414969445                            | 0.008146698    | <b>0.040733489</b> | 162             |
| <i>Stable RNA</i>                                       | -0.797625025                            | 0.214411598    | 0.714705326        | 29              |
| <i>Information pathways</i>                             | -0.260140305                            | 0.397438748    | 0.99359687         | 241             |
| <i>Conserved hypothetical</i>                           | 0.160041507                             | 0.563567935    | 0.999422653        | 1027            |
| <i>Cell wall and cell processes</i>                     | 0.382127259                             | 0.648789781    | 0.999422653        | 761             |
| <i>Virulence, detoxification and adaptation</i>         | 0.654360315                             | 0.743397317    | 0.999422653        | 236             |
| <i>Regulatory proteins</i>                              | 0.938987183                             | 0.825831702    | 0.999422653        | 195             |
| <i>Lipid metabolism</i>                                 | 2.63201945                              | 0.995630114    | 0.999422653        | 268             |
| <i>Intermediary metabolism and respiration</i>          | 3.2549851                               | 0.999422653    | 0.999422653        | 920             |

Table S5. Differential expression analysis of KEGG pathways. Differential pathways analysis with Dextrose as control group and Lipid as treatment, growth stages were used as a batch effect.

| <b>Significant up-regulated pathways</b>              | <b>FDR</b>  | <b>Set size</b> |
|-------------------------------------------------------|-------------|-----------------|
| mtu01120 Microbial metabolism in diverse environments | 0.002487853 | 216             |
| mtu00984 Steroid degradation                          | 0.002487853 | 13              |
| mtu02020 Two-component system                         | 0.03991373  | 54              |
| mtu00620 Pyruvate metabolism                          | 0.044056934 | 47              |
| mtu01200 Carbon metabolism                            | 0.044056934 | 111             |
| mtu00071 Fatty acid degradation                       | 0.044056934 | 50              |
| mtu00310 Lysine degradation                           | 0.044056934 | 38              |
| mtu00280 Valine, leucine and isoleucine degradation   | 0.044056934 | 56              |
| mtu00380 Tryptophan metabolism                        | 0.044056934 | 42              |
| mtu00650 Butanoate metabolism                         | 0.044056934 | 55              |
| mtu00190 Oxidative phosphorylation                    | 0.044056934 | 46              |

Table S6. Differential expression analysis of functional categories for exponential stage. Dextrose exponential condition was used as control and lipid exponential as treatment (DE vs LE).

| <b>Increased expression in LE:</b>              |                                         |                |                    |                 |
|-------------------------------------------------|-----------------------------------------|----------------|--------------------|-----------------|
| <b>Functional category</b>                      | <b>Mean log<sub>2</sub> fold change</b> | <b>p value</b> | <b>FDR</b>         | <b>Set size</b> |
| <i>PE/PPE</i>                                   | 1.351029443                             | 0.088830099    | 0.79256419         | 160             |
| <i>Stable RNA</i>                               | 0.58858318                              | 0.279661374    | 0.79256419         | 22              |
| <i>Regulatory proteins</i>                      | 0.492998416                             | 0.311147797    | 0.79256419         | 195             |
| <i>Conserved hypothetical</i>                   | 0.476105649                             | 0.317025676    | 0.79256419         | 998             |
| <i>Intermediary metabolism and respiration</i>  | -0.139092353                            | 0.555303673    | 0.999254255        | 917             |
| <i>Insertion seqs and phages</i>                | -0.550710317                            | 0.708708303    | 0.999254255        | 83              |
| <i>Virulence, detoxification and adaptation</i> | -0.614619739                            | 0.730442291    | 0.999254255        | 232             |
| <i>Lipid metabolism</i>                         | -0.856270429                            | 0.803878397    | 0.999254255        | 268             |
| <i>Cell wall and cell processes</i>             | -1.725681159                            | 0.957695104    | 0.999254255        | 755             |
| <i>Information pathways</i>                     | -3.196667552                            | 0.999254255    | 0.999254255        | 241             |
| <b>Diminished expression in LE:</b>             |                                         |                |                    |                 |
| <b>Functional category</b>                      | <b>Mean log<sub>2</sub> fold change</b> | <b>p value</b> | <b>FDR</b>         | <b>Set size</b> |
| <i>Information pathways</i>                     | -3.196667552                            | 0.000745745    | <b>0.007457445</b> | 241             |
| <i>Cell wall and cell processes</i>             | -1.725681159                            | 0.042304896    | 0.211524482        | 755             |
| <i>Lipid metabolism</i>                         | -0.856270429                            | 0.196121603    | 0.582583394        | 268             |
| <i>Virulence, detoxification and adaptation</i> | -0.614619739                            | 0.269557709    | 0.582583394        | 232             |
| <i>Insertion seqs and phages</i>                | -0.550710317                            | 0.291291697    | 0.582583394        | 83              |
| <i>Intermediary metabolism and respiration</i>  | -0.139092353                            | 0.444696327    | 0.741160544        | 917             |
| <i>Conserved hypothetical</i>                   | 0.476105649                             | 0.682974324    | 0.800376251        | 998             |
| <i>Regulatory proteins</i>                      | 0.492998416                             | 0.688852203    | 0.800376251        | 195             |
| <i>Stable RNA</i>                               | 0.58858318                              | 0.720338626    | 0.800376251        | 22              |
| <i>PE/PPE</i>                                   | 1.351029443                             | 0.911169901    | 0.911169901        | 160             |

Table S7. Differential expression analysis of functional categories for stationary stage. Dextrose stationary condition was used as control and lipid stationary as treatment (DS vs LS).

| <b>Increased expression in LS:</b>              |                                         |                |                    |                 |
|-------------------------------------------------|-----------------------------------------|----------------|--------------------|-----------------|
| <b>Functional category</b>                      | <b>Mean log<sub>2</sub> fold change</b> | <b>p value</b> | <b>FDR</b>         | <b>Set size</b> |
| <i>Intermediary metabolism and respiration</i>  | 3.168922275                             | 0.000777753    | <b>0.007777532</b> | 920             |
| <i>Cell wall and cell processes</i>             | 2.610061912                             | 0.004571528    | <b>0.019282174</b> | 756             |
| <i>Information pathways</i>                     | 2.51481911                              | 0.006131746    | <b>0.019282174</b> | 241             |
| <i>Lipid metabolism</i>                         | 2.430551828                             | 0.00771287     | <b>0.019282174</b> | 267             |
| <i>Conserved hypothetical</i>                   | -0.411979103                            | 0.659800886    | 0.999974615        | 1017            |
| <i>Stable RNA</i>                               | -1.091112442                            | 0.859640497    | 0.999974615        | 26              |
| <i>Virulence, detoxification and adaptation</i> | -1.29289663                             | 0.901653686    | 0.999974615        | 233             |
| <i>Regulatory proteins</i>                      | -1.843877562                            | 0.967013669    | 0.999974615        | 195             |
| <i>PE/PPE</i>                                   | -2.691080125                            | 0.996251728    | 0.999974615        | 161             |
| <i>Insertion seqs and phages</i>                | -4.164218156                            | 0.999974615    | 0.999974615        | 87              |
| <b>Diminished expression in LS:</b>             |                                         |                |                    |                 |
| <b>Functional category</b>                      | <b>Mean log<sub>2</sub> fold change</b> | <b>p value</b> | <b>FDR</b>         | <b>Set size</b> |
| <i>Insertion seqs and phages</i>                | -4.164218156                            | 2.54E-05       | <b>0.000253852</b> | 87              |
| <i>PE/PPE</i>                                   | -2.691080125                            | 0.003748272    | <b>0.018741361</b> | 161             |
| <i>Regulatory proteins</i>                      | -1.843877562                            | 0.032986331    | 0.109954437        | 195             |
| <i>Virulence, detoxification and adaptation</i> | -1.29289663                             | 0.098346314    | 0.245865784        | 233             |
| <i>Stable RNA</i>                               | -1.091112442                            | 0.140359503    | 0.280719007        | 26              |
| <i>Conserved hypothetical</i>                   | -0.411979103                            | 0.340199114    | 0.566998524        | 1017            |
| <i>Lipid metabolism</i>                         | 2.430551828                             | 0.99228713     | 0.999222247        | 267             |
| <i>Information pathways</i>                     | 2.51481911                              | 0.993868254    | 0.999222247        | 241             |
| <i>Cell wall and cell processes</i>             | 2.610061912                             | 0.995428472    | 0.999222247        | 756             |
| <i>Intermediary metabolism and respiration</i>  | 3.168922275                             | 0.999222247    | 0.999222247        | 920             |

Table S8. Differential expression analysis of functional categories for NRP1 stage. Dextrose NRP1 condition was used as control and lipid NRP1 as treatment (DNRP1 vs LNRP1).

| <b>Increased expression in LNRP1:</b>           |                                         |                |                    |                 |
|-------------------------------------------------|-----------------------------------------|----------------|--------------------|-----------------|
| <b>Functional category</b>                      | <b>Mean log<sub>2</sub> fold change</b> | <b>p value</b> | <b>FDR</b>         | <b>Set size</b> |
| <i>Virulence, detoxification and adaptation</i> | 4.273008619                             | 1.18E-05       | <b>0.000117511</b> | 233             |
| <i>Regulatory proteins</i>                      | 3.925030603                             | 5.17E-05       | <b>0.000258685</b> | 195             |
| <i>Lipid metabolism</i>                         | 2.820063698                             | 0.00249043     | <b>0.008301433</b> | 267             |
| <i>Intermediary metabolism and respiration</i>  | 2.309445168                             | 0.010514734    | <b>0.026286835</b> | 920             |
| <i>Conserved hypothetical</i>                   | 0.368607862                             | 0.35622953     | 0.712459059        | 1002            |
| <i>Insertion seqs and phages</i>                | -0.101260223                            | 0.540264856    | 0.900441427        | 84              |
| <i>Stable RNA</i>                               | -0.399475572                            | 0.654342281    | 0.934774687        | 25              |
| <i>Information pathways</i>                     | -1.44441487                             | 0.925312568    | 0.998612354        | 240             |
| <i>Cell wall and cell processes</i>             | -1.642080768                            | 0.949606567    | 0.998612354        | 756             |
| <i>PE/PPE</i>                                   | -3.015187087                            | 0.998612354    | 0.998612354        | 162             |
| <b>Diminished expression in LNRP1:</b>          |                                         |                |                    |                 |
| <b>Functional category</b>                      | <b>Mean log<sub>2</sub> fold change</b> | <b>p value</b> | <b>FDR</b>         | <b>Set size</b> |
| <i>PE/PPE</i>                                   | -3.015187087                            | 0.001387646    | <b>0.013876457</b> | 162             |
| <i>Cell wall and cell processes</i>             | -1.642080768                            | 0.050393433    | 0.248958105        | 756             |
| <i>Information pathways</i>                     | -1.44441487                             | 0.074687432    | 0.248958105        | 240             |
| <i>Stable RNA</i>                               | -0.399475572                            | 0.345657719    | 0.864144298        | 25              |
| <i>Insertion seqs and phages</i>                | -0.101260223                            | 0.459735144    | 0.919470288        | 84              |
| <i>Conserved hypothetical</i>                   | 0.368607862                             | 0.64377047     | 0.999988249        | 1002            |
| <i>Intermediary metabolism and respiration</i>  | 2.309445168                             | 0.989485266    | 0.999988249        | 920             |
| <i>Lipid metabolism</i>                         | 2.820063698                             | 0.99750957     | 0.999988249        | 267             |
| <i>Regulatory proteins</i>                      | 3.925030603                             | 0.999948263    | 0.999988249        | 195             |
| <i>Virulence, detoxification and adaptation</i> | 4.273008619                             | 0.999988249    | 0.999988249        | 233             |

Table S9. Quantification and statistical analysis of gene expression determined by qRT-PCR.

| GENE           | STAGE       | Dextrose conditions |         |   | Lipid conditions |         |   | STATISTIC ANALYSIS<br>Two Way-ANOVA between:<br>dextrose vs lipids |                |         |              | Relative<br>expression.<br>Fold change* |
|----------------|-------------|---------------------|---------|---|------------------|---------|---|--------------------------------------------------------------------|----------------|---------|--------------|-----------------------------------------|
|                |             | Mean                | Std Dev | N | Mean             | Std Dev | N | DF                                                                 | Mean<br>Square | F Ratio | P value      |                                         |
| <i>rv3160c</i> | Exponential | 1.6E+05             | 3.6E+04 | 6 | 1.5E+06          | 5.9E+05 | 8 | 1                                                                  | 5.9E+12        | 2.8E+01 | <0.001       | 9.4↑                                    |
|                | Stationary  | 2.1E+05             | 1.3E+05 | 7 | 1.1E+06          | 3.0E+05 | 3 | 1                                                                  | 1.5E+12        | 4.5E+01 | <0.001       | 5.1↑                                    |
|                | NRP1        | 7.8E+04             | 3.3E+03 | 4 | 2.5E+07          | 2.0E+07 | 7 | 1                                                                  | 1.6E+15        | 6.4E+00 | 0.033        | 326.8↑                                  |
| <i>rv3161c</i> | Exponential | 1.3E+03             | 1.6E+02 | 3 | 1.1E+05          | 1.3E+04 | 4 | 1                                                                  | 2.0E+10        | 1.9E+02 | <0.001       | 82.7↑                                   |
|                | Stationary  | 6.7E+04             | 4.7E+04 | 7 | 4.8E+05          | 1.3E+05 | 3 | 1                                                                  | 3.5E+11        | 5.9E+01 | <0.001       | 7.1↑                                    |
|                | NRP1        | 1.5E+04             | 6.6E+03 | 7 | 5.6E+06          | 5.1E+06 | 7 | 1                                                                  | 1.1E+14        | 8.4E+00 | 0.013        | 372.2↑                                  |
| <i>PPE53</i>   | Exponential | 2.1E+05             | 6.7E+04 | 7 | 5.1E+05          | 1.1E+05 | 6 | 1                                                                  | 2.9E+11        | 3.4E+01 | <0.001       | 2.4↑                                    |
|                | Stationary  | 5.3E+04             | 8.0E+03 | 3 | 5.8E+04          | 1.0E+04 | 3 | 1                                                                  | 3.5E+07        | 4.2E-01 | <b>0.553</b> | 1.1                                     |
|                | NRP1        | 2.9E+05             | 2.1E+05 | 6 | 5.6E+06          | 4.3E+06 | 6 | 1                                                                  | 2.9E+11        | 3.4E+01 | <0.001       | 19.1↑                                   |
| <i>che1</i>    | Exponential | 6.0E+05             | 7.7E+04 | 6 | 9.6E+05          | 4.7E+05 | 7 | 1                                                                  | 4.4E+11        | 3.5E+00 | 0.089        | 1.6↑                                    |
|                | Stationary  | 5.0E+04             | 1.9E+04 | 6 | 9.0E+05          | 1.3E+05 | 3 | 1                                                                  | 1.4E+12        | 2.6E+02 | <0.001       | 17.9↑                                   |
|                | NRP1        | 1.3E+05             | 2.7E+04 | 3 | 2.7E+05          | 2.4E+04 | 4 | 1                                                                  | 3.5E+10        | 5.6E+01 | <0.001       | 2.1↑                                    |
| <i>mmpS5</i>   | Exponential | 1.4E+05             | 5.4E+04 | 8 | 5.9E+06          | 1.9E+06 | 6 | 1                                                                  | 1.1E+14        | 7.6E+01 | <0.001       | 41.4↑                                   |
|                | Stationary  | 7.4E+04             | 8.9E+03 | 4 | 1.6E+06          | 3.3E+04 | 4 | 1                                                                  | 4.9E+12        | 8.5E+03 | <0.001       | 22.0↑                                   |
|                | NRP1        | 1.9E+06             | 8.0E+05 | 8 | 1.5E+07          | 1.3E+07 | 6 | 1                                                                  | 5.7E+14        | 7.6E+00 | 0.017        | 7.9↑                                    |
| <i>hsd4A</i>   | Exponential | 4.8E+03             | 6.9E+02 | 3 | 2.0E+04          | 9.1E+03 | 4 | 1                                                                  | 3.9E+08        | 7.7E+00 | 0.039        | 4.2↑                                    |
|                | Stationary  | 3.4E+04             | 7.5E+03 | 6 | 4.6E+05          | 1.1E+05 | 3 | 1                                                                  | 3.6E+11        | 1.0E+02 | <0.001       | 13.4↑                                   |
|                | NRP1        | 1.5E+05             | 4.3E+04 | 6 | 1.1E+06          | 9.8E+05 | 6 | 1                                                                  | 2.6E+12        | 5.4E+00 | 0.043        | 7.0↑                                    |
| <i>usfY</i>    | Exponential | 9.1E+04             | 2.6E+04 | 6 | 1.1E+06          | 4.2E+05 | 6 | 1                                                                  | 2.9E+12        | 3.3E+01 | <0.001       | 11.9↑                                   |
|                | Stationary  | 1.1E+05             | 5.3E+03 | 3 | 2.9E+06          | 2.9E+05 | 3 | 1                                                                  | 1.2E+13        | 2.8E+02 | <0.001       | 26.7↑                                   |
|                | NRP1        | 1.5E+06             | 9.2E+05 | 6 | 2.5E+07          | 2.4E+07 | 7 | 1                                                                  | 1.9E+15        | 6.1E+00 | 0.031        | 16.8↑                                   |
| <i>hrp1</i>    | Exponential | 3.4E+05             | 8.5E+04 | 6 | 2.6E+07          | 1.7E+07 | 7 | 1                                                                  | 2.1E+15        | 1.4E+01 | 0.003        | 76.4↑                                   |
|                | Stationary  | 4.0E+05             | 1.2E+05 | 6 | 3.1E+06          | 4.0E+05 | 3 | 1                                                                  | 1.4E+13        | 2.5E+02 | <0.001       | 7.6↑                                    |
|                | NRP1        | 2.1E+07             | 9.8E+06 | 7 | 1.7E+07          | 2.6E+07 | 6 | 1                                                                  | 1.1E+15        | 5.2E+00 | <b>0.051</b> | -1.2                                    |
| <i>Rv1639c</i> | Exponential | 4.0E+05             | 1.8E+05 | 7 | 3.1E+05          | 7.4E+04 | 6 | 1                                                                  | 2.7E+10        | 1.3E+00 | 0.274        | -1.3↓                                   |
|                | Stationary  | 1.1E+04             | 2.8E+03 | 6 | 7.2E+04          | 1.4E+04 | 3 | 1                                                                  | 7.5E+09        | 1.2E+02 | <0.001       | 6.4↑                                    |
|                | NRP1        | 5.0E+05             | 2.7E+05 | 6 | 4.6E+04          | 1.1E+04 | 7 | 1                                                                  | 6.6E+11        | 2.0E+01 | 0.001        | -10.8                                   |
| <i>Rv0560</i>  | Exponential | 9.2E+04             | 1.7E+04 | 7 | 5.9E+04          | 9.2E+03 | 7 | 1                                                                  | 3.7E+09        | 2.0E+01 | <0.001       | 0.6↑                                    |
|                | Stationary  | 1.6E+05             | 1.5E+05 | 7 | 4.9E+04          | 6.2E+03 | 4 | 1                                                                  | 3.4E+10        | 2.1E+00 | 0.177        | -3.4↓                                   |
|                | NRP1        | 6.2E+04             | 4.7E+04 | 7 | 9.2E+06          | 6.0E+06 | 7 | 1                                                                  | 2.9E+14        | 1.6E+01 | 0.002        | 148.3↑                                  |

\*Ratio of gene expression in lipid/dextrose conditions. Increased (↑) and diminished (↓) expression in lipids.

Table S10. Primers used for qPCR

| Gen / Rv number               | Primers                                                               | Product name                                                       | Design reference |
|-------------------------------|-----------------------------------------------------------------------|--------------------------------------------------------------------|------------------|
| <i>rpsL</i> / <i>rv0682</i>   | Fw: 5'-CCTTCAGAGCCGCGGTCT- 3'<br>Rev: 5'-CCAACCATCCAGCAGCTGG- 3'      | Ribosomal protein S12                                              | 1                |
| <i>rrs</i> / <i>MTB000019</i> | Fw: ATGACGGCCTTCGGGTTGTAA<br>Rev: CGGCTGCTGGCACGTAGTTG                | Ribosomal RNA 16S                                                  | 1                |
| <i>rv3160c</i>                | Fw: CTGGACCACCTGCATGCTTC<br>Rev: CCATCTCCGCGACTAGCTCC                 | Possible transcriptional regulatory protein (probably TetR-family) | 2                |
| <i>Rv3161c</i>                | Fw: CAGGGTTCCCTTCACCGTTC<br>Rev: GCGGAATAAAGCCGAACCAC                 | Possible dioxygenase                                               | 2                |
| <i>PPE53</i> / <i>rv3159c</i> | Fw: CAATGCCACCAAGTTGTGCG<br>Rev: ACATCGGCTCCTCCAACATC                 | PPE family protein PPE53                                           | This study       |
| <i>che1</i> / <i>rv2393</i>   | Fw: 5' -GATCGGCTCATCGCATCCC- 3'<br>Rev: 5' -CTCCGGTCGGGTGATGAAAG- 3'  | Ferrochelatase Che1                                                | This study       |
| <i>mmpS5</i> / <i>Rv0677c</i> | Fw: GCCGGAAACTTCGTACTIONCA<br>Rev: CCGCACTTTCTTTGGTTCCG               | Possible conserved membrane protein MmpS5                          | This study       |
| <i>hsd4A</i> / <i>rv3502c</i> | Fw: 5' -TTGCGGGTGAGCAGAAAATG- 3'<br>Rev: 5' -CATCGTGGTGAACAATGCCG- 3' | Possible 17-beta-hydroxysteroid dehydrogenase                      | This study       |
| <i>usfY</i> / <i>rv3288c</i>  | Fw: 5' -ACAGATACCCAGGCCAATGC- 3'<br>Rev: 5' -CGGAATAGGACGGAAACGGA- 3' | Putative protein UsfY                                              | This study       |
| <i>hrp1</i> / <i>rv2626c</i>  | Fw: GCGGACCTGATGTTCTTCCA<br>Rev: CTAGACCCGAATACCGCCAC                 | Hypoxic response protein 1 Hrp1                                    | This study       |
| <i>rv1639c</i>                | Fw: ATCCACGAATACCACGACGG<br>Rev: GTCAATTCAACACACCCGCC                 | Conserved hypothetical membrane protein                            | This study       |
| <i>rv0560</i>                 | Fw: CGATTGCAGATAGCCCTCCC<br>Rev: TTTACCGGCTATGACGGCAG                 | Possible benzoquinone methyltransferase (methylase)                | This study       |

## REFERENCES:

1. Badillo-López, C. *et al.* Differential expression of *dnaA* and *dosR* genes among members of the *Mycobacterium tuberculosis* complex under oxic and hypoxic conditions. *Int. Microbiol.* **13**, 9–13 (2010).
2. Betts, J. C. *et al.* Signature gene expression profiles discriminate between isoniazid- thiolactomycin-, and triclosan-treated *Mycobacterium tuberculosis* . *Antimicrob. Agents Chemother.* **47**, 2903–2913 (2003).
